# Supplementary material for: Harnessing Nanomedicine to Potentiate the Chemo-Immunotherapeutic Effects of Doxorubicin and Alendronate Co-Encapsulated in Pegylated Liposomes
Source: MDPI journal article supplement (doi:10.3390/pharmaceutics15112606), 2023-11-09

# Supplement Figures

Gabizon et al.

Figure S1:

*In vitro* growth curve of Wehi-164 mouse sarcoma cells exposed for 72 h to free Dox, PLD or PLAD

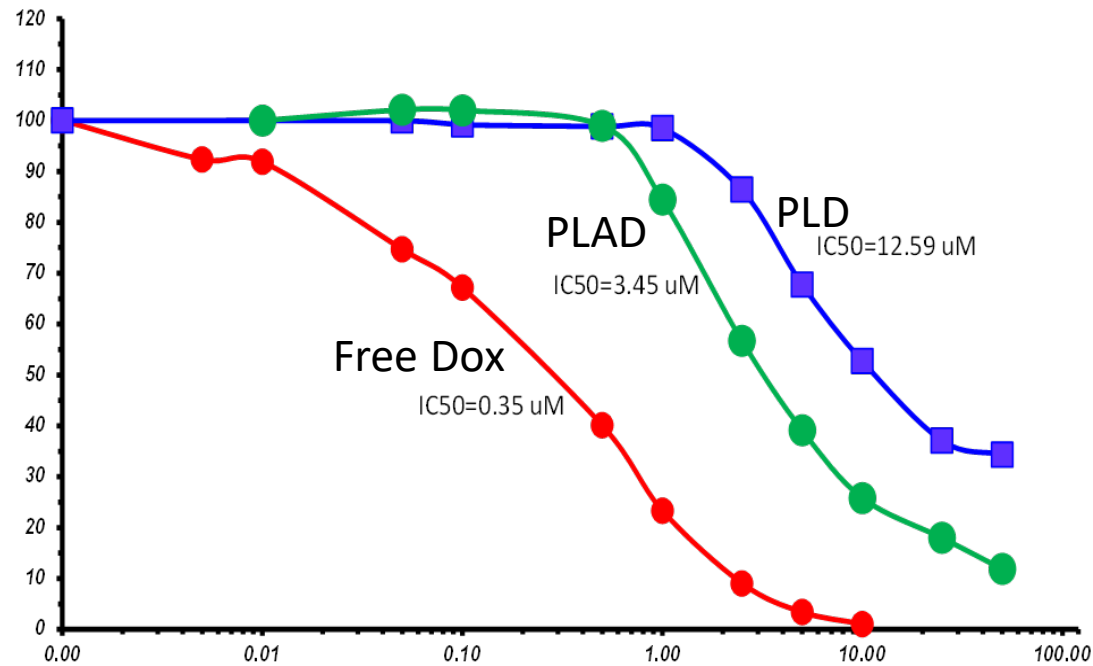

Figure S2:

Antitumor activity of PLAD combined with V $\gamma$ 9V $\delta$ 2 T cells (for further details, see Figure 9A-B)

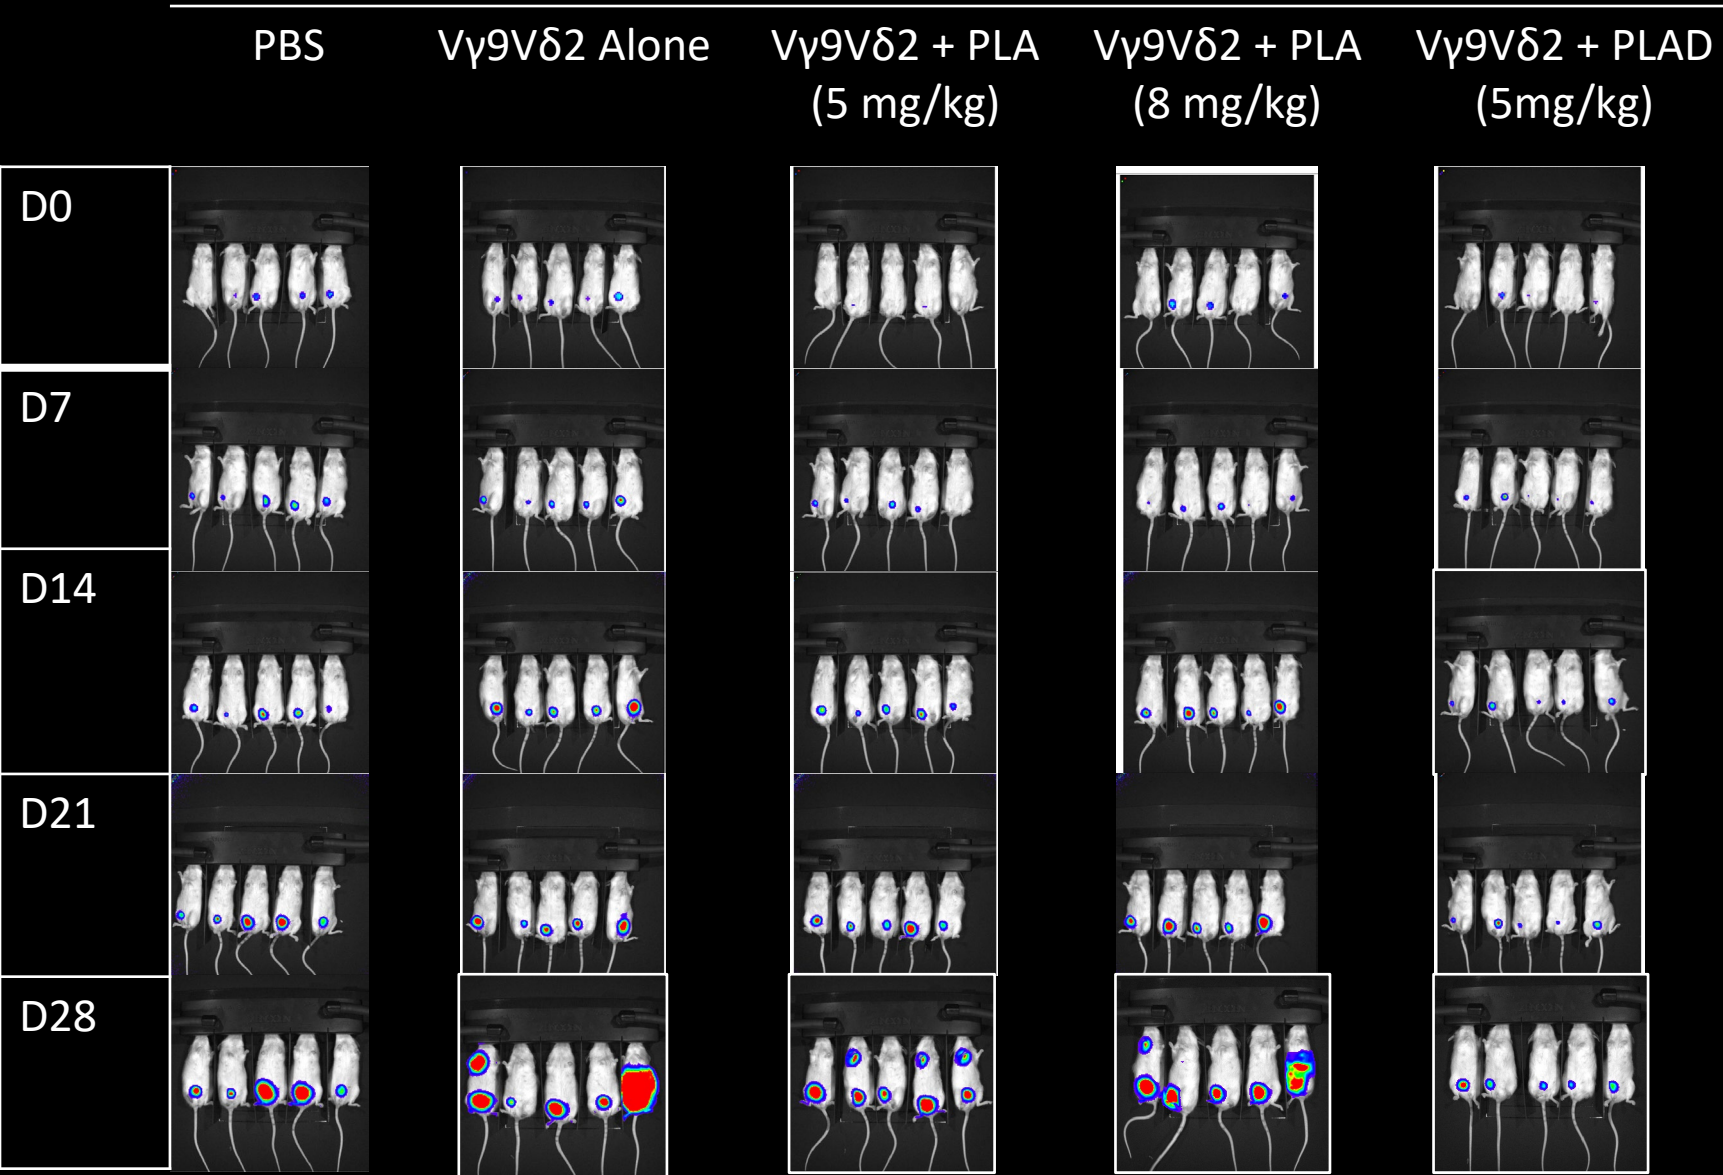

Supplement: s1 [file s1]
